# Supplementary material
Source: ML conference proceedings conference paper supplement (https://aclanthology.org/2024.semeval-1.97)

$U_1$ 

**Phoebe:** Get out of here you lurker! Go on! Get!

*anger*

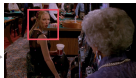 $U_2$ 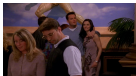

**Chandler:** Hey Pheebs!

*joy*

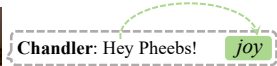 $U_3$ 

**Phoebe:** Ohh! You made up!

*surprise*

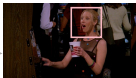 $U_4$ 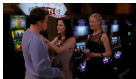

**Monica:** Yeah, I could not be mad at him for too long.

*joy*

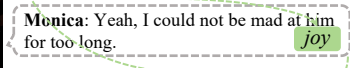 $U_5$ 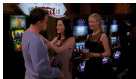

**Chandler:** she could not live without the Chan Love.

*joy*

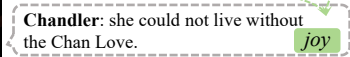 $U_6$ 

**Phoebe:** Aw, get a room.

*disgust*

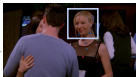 $U_7$ 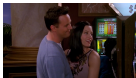

**Monica:** We have one.

*neutral*

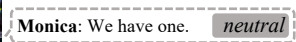

Supplement: SupplementaryMaterial [file 2024.semeval-1.97.SupplementaryMaterial.zip]
