# Supplementary material
Source: ML conference proceedings conference paper supplement (https://aclanthology.org/2024.semeval-1.97)
Supplement: SupplementaryMaterial [file 2024.semeval-1.97.SupplementaryMaterial.zip]

**prompt:** Now you are expert of sentiment and emotional analysis. The following conversation noted between [*conversation*] involves several speakers.

Please infer, considering the conversation content and the facial expressions of the characters in the image, which utterance leads to [*speaker*] feeling [*emotion*].

**target:** [*conversation*  $U_i$ ].
