# Supplementary material
Source: ML conference proceedings conference paper supplement (https://aclanthology.org/2024.semeval-1.97)

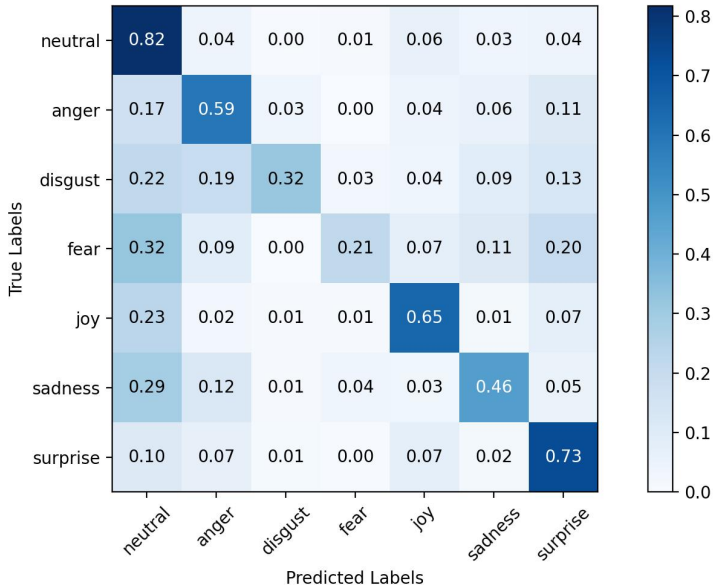

Supplement: SupplementaryMaterial [file 2024.semeval-1.97.SupplementaryMaterial.zip]

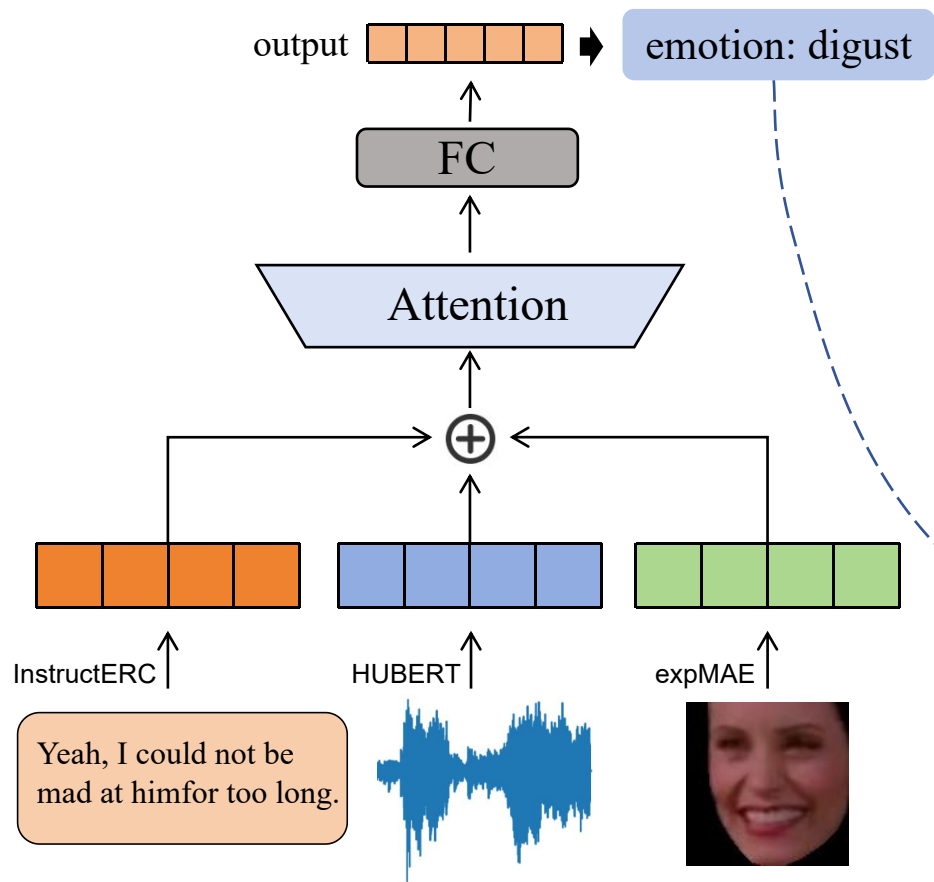

(a) multimodal emotion recognition (MER)

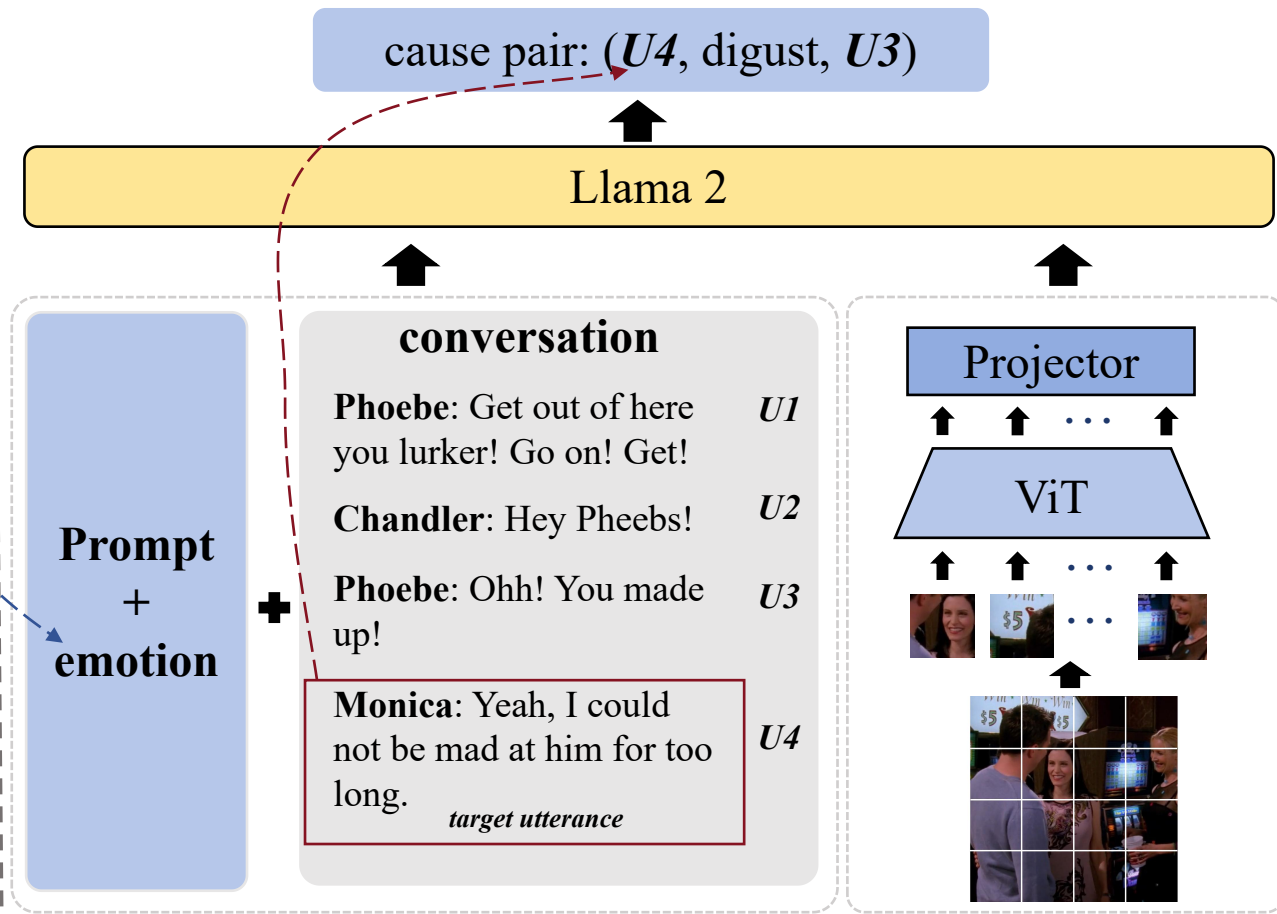

(b) multimodal cause extraction (MCE)

Supplement: SupplementaryMaterial [file 2024.semeval-1.97.SupplementaryMaterial.zip]
